# Supplementary material for: Group IIA Secreted Phospholipase A2 Plays a Central Role in the Pathobiology of COVID-19
Source: bioRxiv or medRxiv preprint supplement (doi:10.1101/2021.02.22.21252237), 2021-02-23
Supplement: Supplementary file [file media-1.pdf]

## SUPPLEMENTARY INFORMATION

### Group IIA Secreted Phospholipase A<sub>2</sub> Plays a Central Role in the Pathobiology of COVID-19

#### SUPPLEMENTARY FIGURES

Figure S1

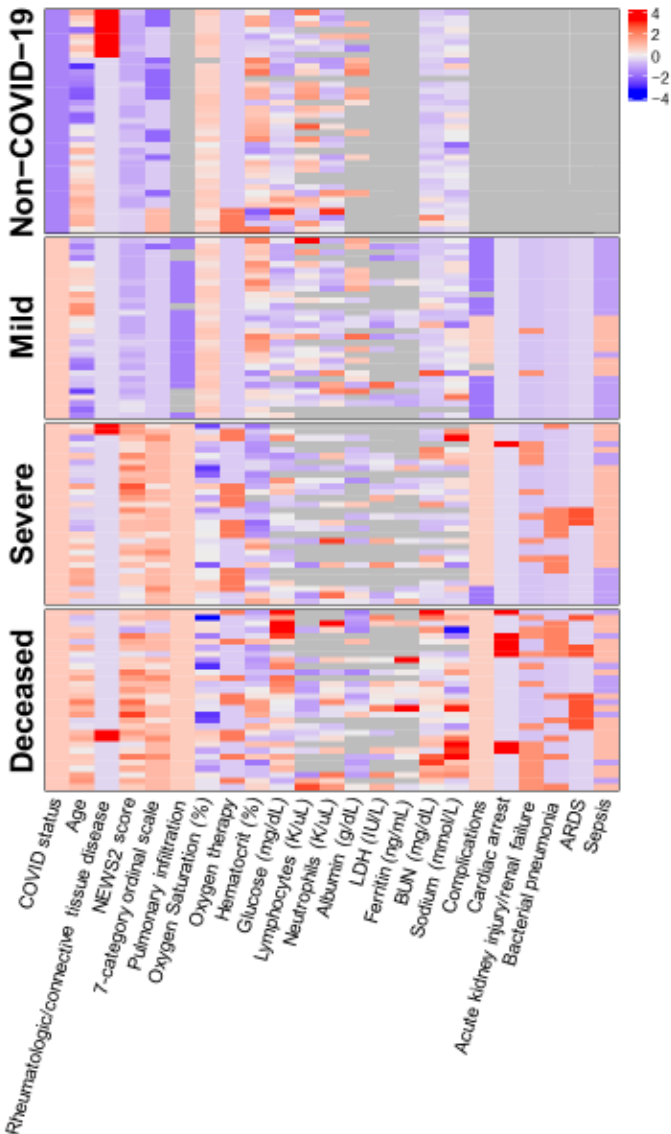

**Figure S1. Clinical Indices and Disease Status.** Clinical indices that vary significantly ( $FDR < 0.05$ , F-test) across 4 patient groups are shown in a heatmap, with blue to red representing low to high values of each index, and the color intensity representing the magnitude of value (mean-centered, scaled by the standard deviation, and log-transformed with non-Gaussian distribution). Missing values are shown in grey.

Figure S2

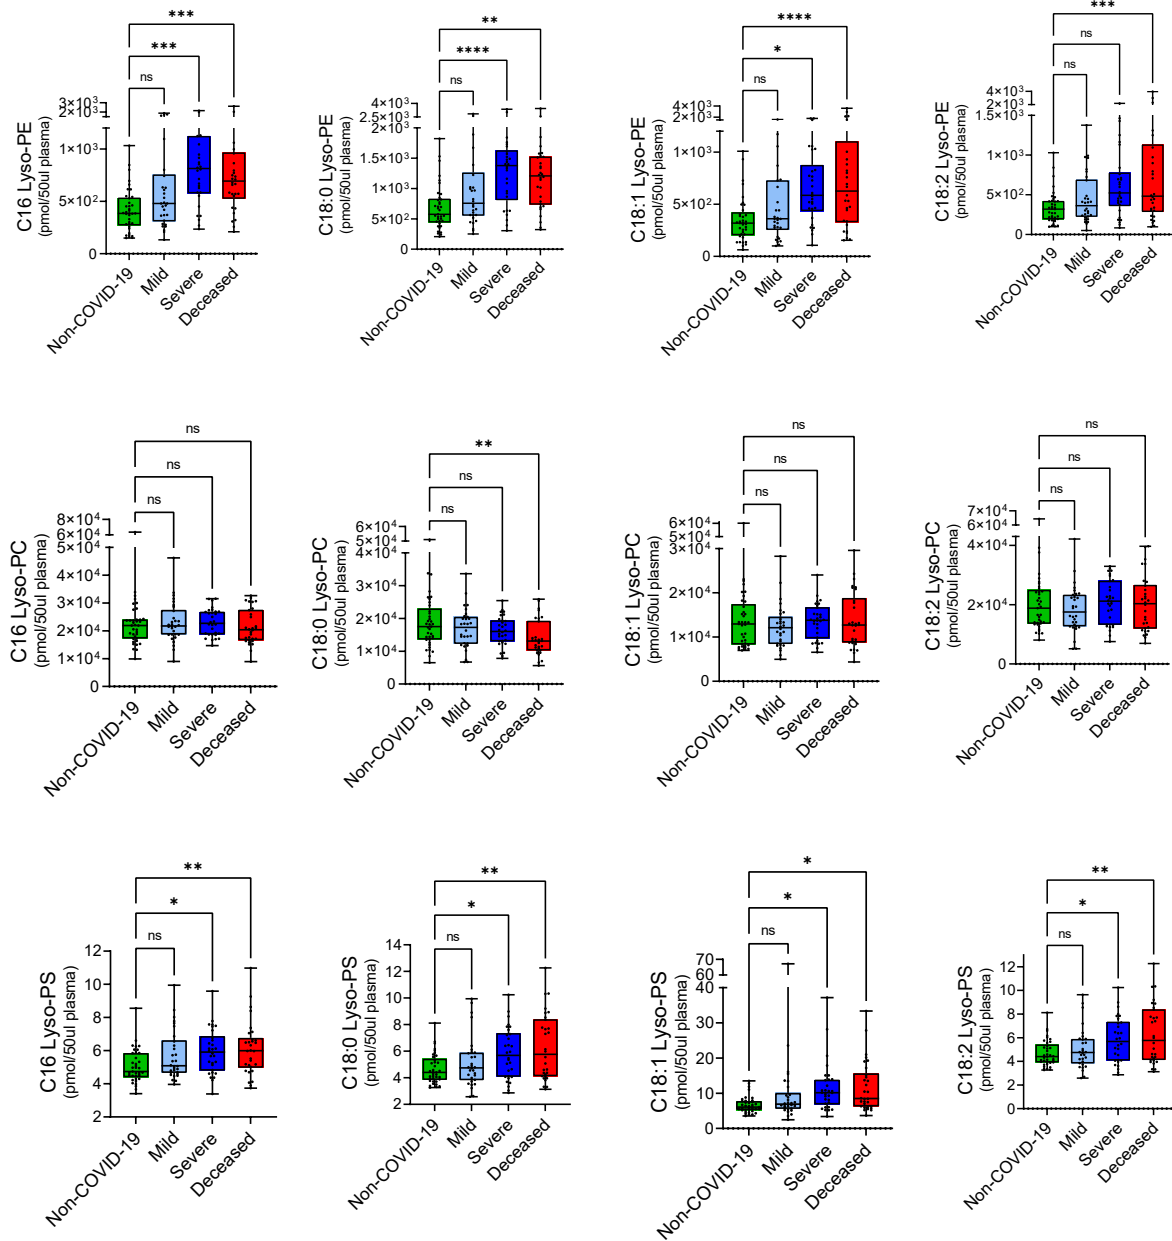

**Figure S2. Targeted Lyso-phospholipid (Lyso-PL) Analysis.** Lyso-PLs were identified as top molecules of interest from the qualitative untargeted lipidome data set. Samples were re-analyzed utilizing lyso-PL standards in a targeted lyso-PL method. Asterisks indicate significance by ANOVA (1-way ANOVA with Dunnett multiple comparison): \*  $p < 0.05$ ; \*\*  $p < 0.01$ ; \*\*\*  $p < 0.001$ ; \*\*\*\*  $p < 0.0001$

**Figure S3**

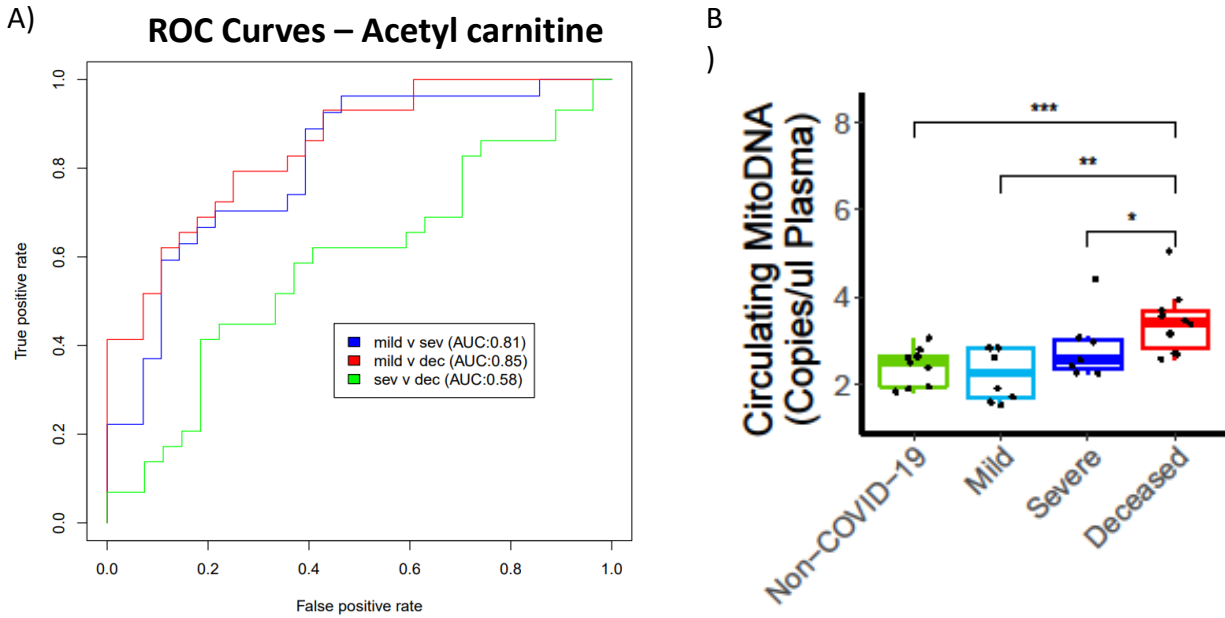

**Figure S3. Markers of Mitochondrial Dysfunction.** A) ROC curves demonstrate the performance of acetylcarnitine as a predictor of disease status. B) Mitochondrial DNA was quantified in a selected subset of patients (n=34; 9 non-COVID-19, 8 mild, 7 severe, and 10 deceased COVID-19 patients). Summed copy numbers of genes for human cytochrome C and cytochrome C oxidase subunit III are shown. Data are log transformed with one-sided Wilcoxon test significance indicated as: \* p<0.05; \*\* p<0.01; \*\*\* p<0.001.
